# Supplementary material for: Land Surface Greening and CO2 Fertilization More than Offset the Gross Carbon Sequestration Decline Caused by Land Cover Change and the Enhanced Vapour Pressure Deficit in Europe
Source: MDPI journal article supplement (doi:10.3390/rs15051372), 2023-02-28
Supplement: s1 [file s1]

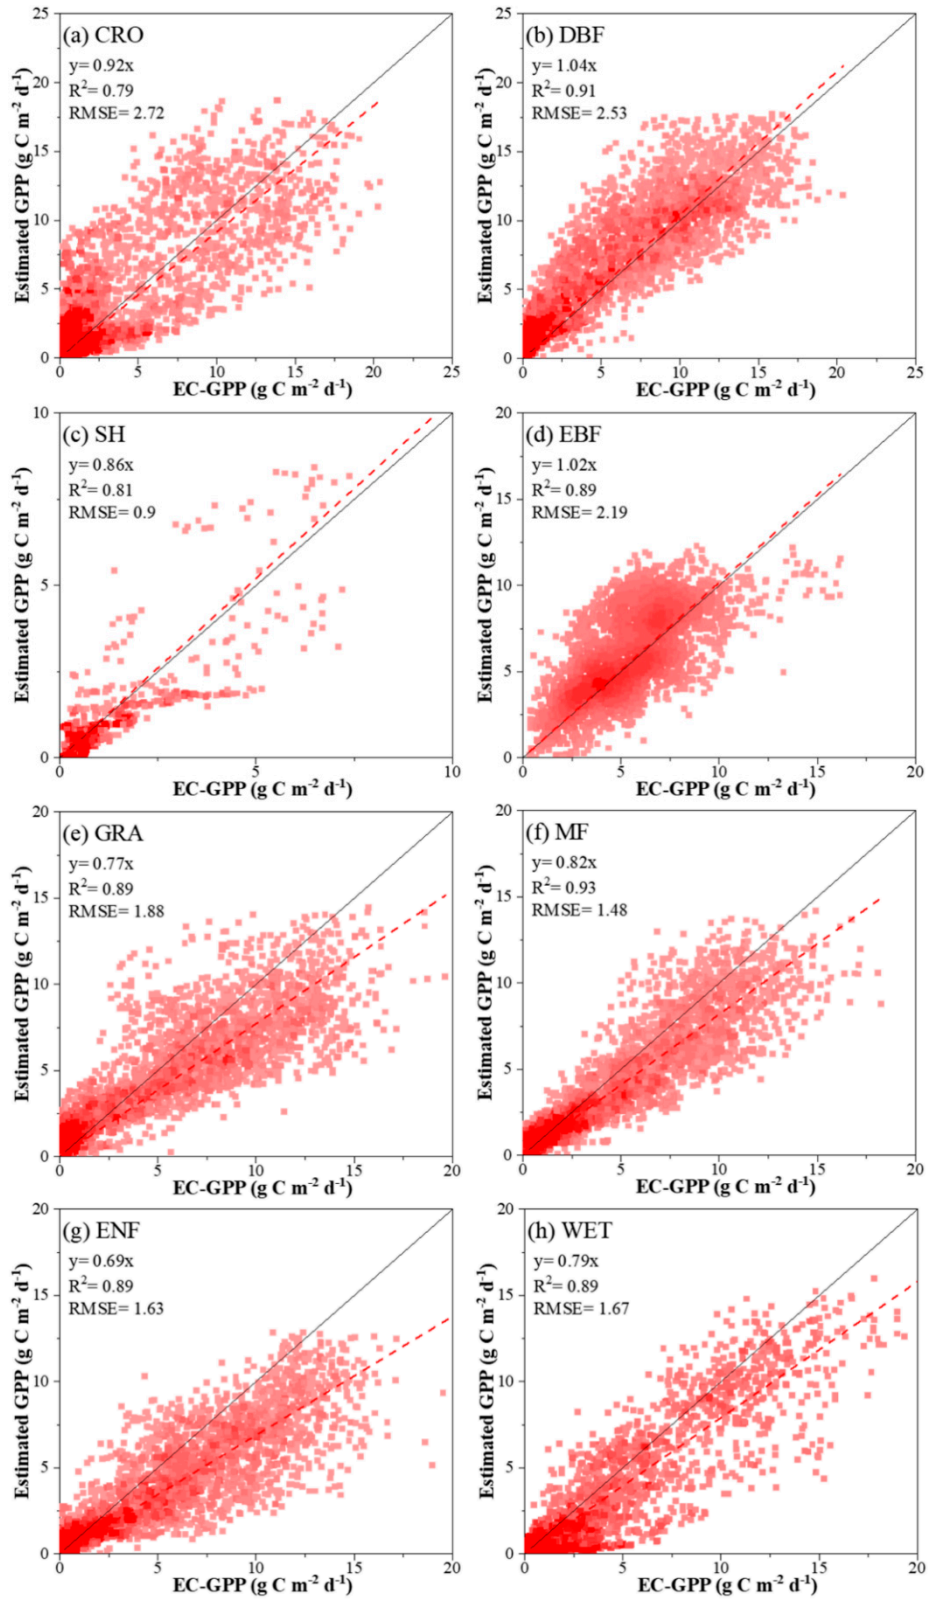

**Figure S1.** Model validation accuracy for nine PFTs: (a) CRO, (b) DBF, (c) SH, (d) EBF, (e) GRA, (f) MF, (g) ENF, and (h) WET.

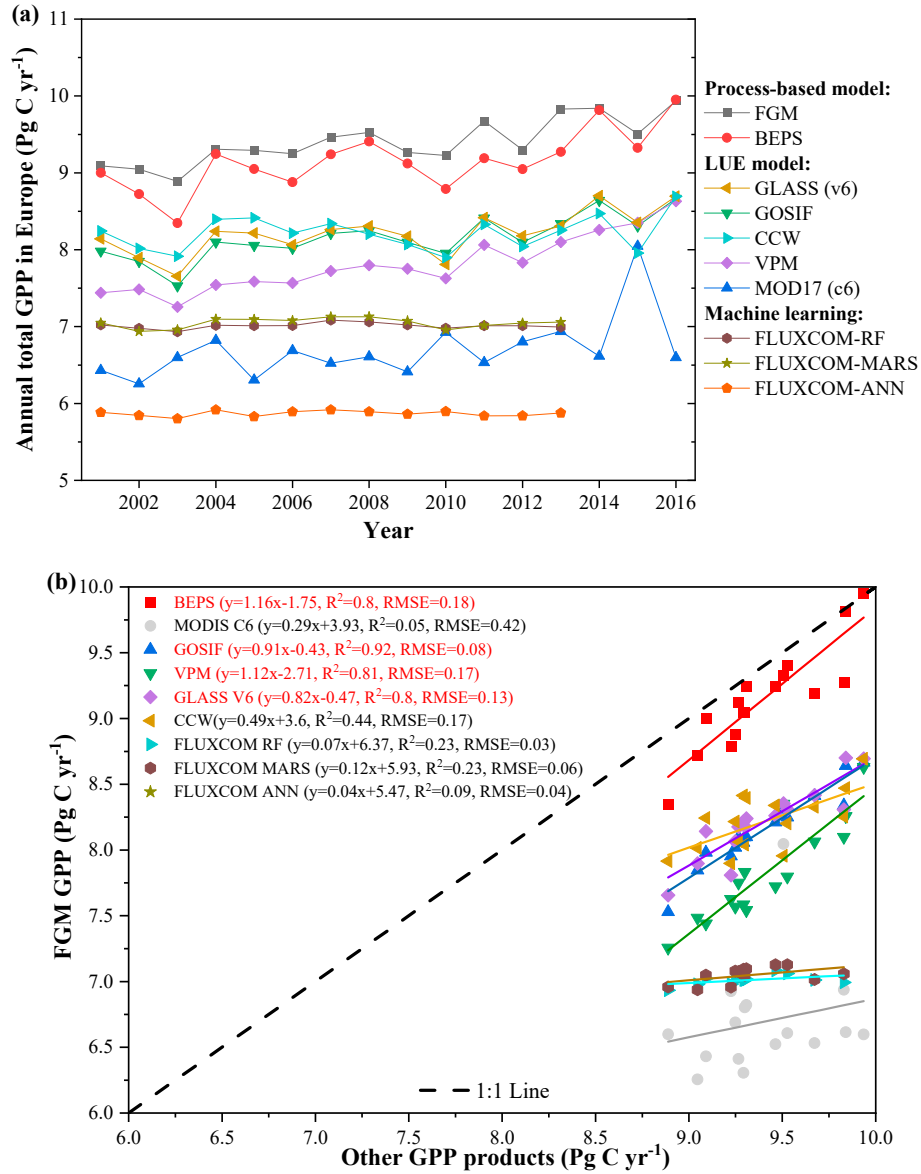

**Figure S2.** Inter-comparison of **(a)** interannual dynamics in GPP estimated by FGM and other methods, including one empirical model, four light use efficiency (LUE) models, three machine learning methods, and one process-based biophysical model. **(b)** Scatter plots between the FGM GPP and other GPP products. As listed in Table S2, the GOSIF GPP product was derived from the empirical relationships between GPP and SIF (Li and Xiao 2019; Xiao et al. 2019). The CCW (Zhang et al. 2016), MOD17 (Running et al. 2004), VPM (Zhang et al. 2017), and GLASS (Yuan et al. 2010; Yuan et al. 2007) products are estimated based on LUE models. FLUXCOM GPP products are estimated by three machine learning approaches, including an artificial neural network (ANN), the multivariate adaptive regression splines method (MARS), and the random forest method (RF) (Jung et al. 2020; Tramontana et al. 2016). In addition, one process model-based GPP product (i.e., BEPS) is also included (Chen et al. 2019a; He et al. 2021; Liu et al. 2014).

**Table S1.** Accuracy of model calibration and validation and the calibrated  $g_1$  for nine plant functional types (PFTs).

| PFTs | $g_1$ <sup>1</sup> | Sites for Calibration          | Sites for Validation           |
|------|--------------------|--------------------------------|--------------------------------|
| CSH  | 1.14               | US-KS2                         | RU-Vrk                         |
| CRO  | 10                 | DE-Geb, DE-Seh, IT-BCi, IT-Cas | BE-Lon, DE-Kli, FR-Gri         |
| DBF  | 1.66               | DE-Lnf, FR-Fon, IT-Col         | DE-Hai, IT-Ro1, IT-Ro2         |
| ENF  | 0.62               | CZ-BK1, RU-Fyo, IT-ren, NL-Loo | CH-Dav, DE-Obe, DE-Tha, IT-Lav |
| EBF  | 0.62               | FR-Pue                         | IT-Cpz                         |
| GRA  | 1.14               | CZ-BK2, CH-Cha, CH-Oe1, IT-Tor | IT-MBo, DE-Gri, CH-Fru         |
| MF   | 0.62               | CH-Lae, BE-Bra                 | BE-Vie                         |
| OSH  | 10                 | ES-LgS                         | ES-Lgs                         |
| WET  | 0.62               | DE-Spw, DE-Zrk, CZ-Wet         | DE-Akm, DE-SfN                 |

<sup>1</sup> Abbreviations: closed shrublands (CSH), croplands (CRO), deciduous broadleaf forest (DBF), evergreen needleleaf forest (ENF), evergreen broadleaf forest (EBF), grasslands (GRA), mixed forest (MF), open shrublands (OSH), and wetland (WET).

**Table S2.** Information of nine GPP products for intercomparison.

| GPP        | Spatial resolution | Model               | Time period | Website                                                                                                                                                                                                                                                                                   | Reference                                                              |
|------------|--------------------|---------------------|-------------|-------------------------------------------------------------------------------------------------------------------------------------------------------------------------------------------------------------------------------------------------------------------------------------------|------------------------------------------------------------------------|
| GOSIF      | 0.05°              | Empirical model     | 2001-2016   | <a href="https://globalecology.unh.edu//data/GOSIF.html">https://globalecology.unh.edu//data/GOSIF.html</a>                                                                                                                                                                               | (Li and Xiao 2019; Li et al. 2018)                                     |
| BEPS       | 0.073°             | Process-based model | 2001-2016   | <a href="http://www.nesdc.org.cn/sdo/detail?id=612f42ee7e28172cbcd3d809">http://www.nesdc.org.cn/sdo/detail?id=612f42ee7e28172cbcd3d809</a>                                                                                                                                               | (Chen et al. 2019a; He et al. 2021; Liu et al. 2014; Xiao et al. 2019) |
| GLASS (v6) | 500 m              | LUE model           | 2001-2016   | <a href="http://www.glass.umd.edu/GPP/MODIS/500m/">http://www.glass.umd.edu/GPP/MODIS/500m/</a>                                                                                                                                                                                           | (Yuan et al. 2010; Yuan et al. 2007)                                   |
| MODIS (c6) | 500 m              | LUE model           | 2001-2016   | <a href="https://lpdaac.usgs.gov/products/mod17a2hv006/">https://lpdaac.usgs.gov/products/mod17a2hv006/</a>                                                                                                                                                                               | (Running et al. 2004)                                                  |
| VPM        | 500 m              | LUE model           | 2001-2016   | <a href="https://figshare.com/collections/A_global_moderate_resolution_dataset_of_gross_primary_production_of_vegetation_for_2000-2016/3789814">https://figshare.com/collections/A_global_moderate_resolution_dataset_of_gross_primary_production_of_vegetation_for_2000-2016/3789814</a> | (Zhang et al. 2017)                                                    |
| CCW        | 0.05°              | LUE model           | 2001-2015   | <a href="https://osf.io/mnptv/?view_only=77e57939fe474ae88f356ec64c573c45">https://osf.io/mnptv/?view_only=77e57939fe474ae88f356ec64c573c45</a>                                                                                                                                           | (Zhang et al. 2016)                                                    |
| FLUXCOM    | 0.5°               | LUE model           | 2001-2016   | <a href="http://www.fluxcom.org/CF-Download/">http://www.fluxcom.org/CF-Download/</a>                                                                                                                                                                                                     | (Jung et al. 2020; Tramontana et al. 2016)                             |

## References:

- Li, X., & Xiao, J. (2019). A global, 0.05-degree product of solar-induced chlorophyll fluorescence derived from OCO-2, MODIS, and reanalysis data. *Remote Sensing*, *11*, 517
- Chen, J.M., Ju, W., Ciais, P., Viovy, N., Liu, R., Liu, Y., & Lu, X. (2019a). Vegetation structural change since 1981 significantly enhanced the terrestrial carbon sink. *Nature Communications*, *10*, 1-7
- He, Q., Ju, W., Dai, S., He, W., Song, L., Wang, S., Li, X., & Mao, G. (2021). Drought risk of global terrestrial gross primary productivity over the last 40 years detected by a remote sensing-driven process model. *Journal of Geophysical Research: Biogeosciences*, *126*, e2020JG005944
- Liu, Y., Zhou, Y., Ju, W., Wang, S., Wu, X., He, M., & Zhu, G. (2014). Impacts of droughts on carbon sequestration by China's terrestrial ecosystems from 2000 to 2011. *Biogeosciences*, *11*, 2583-2599
- Xiao, J., Li, X., He, B., Arain, M.A., Beringer, J., Desai, A.R., Emmel, C., Hollinger, D.Y., Krasnova, A., Mammarella, I., Noe, S.M., Serrano Ortiz, P., Rey-Sanchez, C., Rocha, A.V., & Varlagin, A. (2019). Solar-induced chlorophyll fluorescence exhibits a universal relationship with gross primary productivity across a wide variety of biomes. *Global Change Biology*, *25*, e4-e6
- Yuan, W., Liu, S., Yu, G., Bonnefond, J.-M., Chen, J., Davis, K., Desai, A.R., Goldstein, A.H., Gianelle, D., & Rossi, F. (2010). Global estimates of evapotranspiration and gross primary production based on MODIS and global meteorology data. *Remote sensing of environment*, *114*, 1416-1431
- Yuan, W., Liu, S., Zhou, G., Zhou, G., Tieszen, L.L., Baldocchi, D., Bernhofer, C., Gholz, H., Goldstein, A.H., & Goulden, M.L. (2007). Deriving a light use efficiency model from eddy covariance flux data for predicting daily gross primary production across biomes. *Agricultural and Forest Meteorology*, *143*, 189-207
- Running, S.W., Nemani, R.R., Heinsch, F.A., Zhao, M., Reeves, M., & Hashimoto, H. (2004). A continuous satellite-derived measure of global terrestrial primary production. *Bioscience*, *54*, 547-560
- Schöttler, M.A., & Tóth, S.Z. (2014). Photosynthetic complex stoichiometry dynamics in higher plants: environmental acclimation and photosynthetic flux control. *Frontiers in Plant Science*, *5*, 188
- Zhang, Y., Xiao, X., Wu, X., Zhou, S., Zhang, G., Qin, Y., & Dong, J. (2017). A global moderate resolution dataset of gross primary production of vegetation for 2000–2016. *Scientific data*, *4*, 1-13
- Zhang, Y., Song, C., Sun, G., Band, L.E., McNulty, S., Noormets, A., Zhang, Q., & Zhang, Z. (2016). Development of a coupled carbon and water model for estimating global gross primary productivity and evapotranspiration based on eddy flux and remote sensing data. *Agricultural and Forest Meteorology*, *223*, 116-131
- Jung, M., Schwalm, C., Migliavacca, M., Walther, S., Camps-Valls, G., Koirala, S., Anthoni, P., Besnard, S., Bodesheim, P., & Carvalhais, N. (2020). Scaling carbon fluxes from eddy covariance sites to globe: synthesis and evaluation of the FLUXCOM approach. *Biogeosciences*, *17*, 1343-1365
- Tramontana, G., Jung, M., Schwalm, C.R., Ichii, K., Camps-Valls, G., Ráduly, B.,

Reichstein, M., Arain, M.A., Cescatti, A., & Kiely, G. (2016). Predicting carbon dioxide and energy fluxes across global FLUXNET sites with regression algorithms. *Biogeosciences*, *13*, 4291-4313
